# Supplementary material for: Diagnostic Accuracy of Web-Based COVID-19 Symptom Checkers: Comparison Study
Source: PubMed Central journal article supplement (PMC7541039; doi:10.2196/21299), 2020-10-06
Supplement: jmir_v22i10e21299_app1.pdf [file jmir_v22i10e21299_app1.pdf]

Multimedia Appendix 1. Symptom frequencies used in Multimedia Appendix 2.

|                                                                                                                                                                                                                                                                                                                                                                                                                               | COVID-19 | Common cold | Influenza | Hay fever |
|-------------------------------------------------------------------------------------------------------------------------------------------------------------------------------------------------------------------------------------------------------------------------------------------------------------------------------------------------------------------------------------------------------------------------------|----------|-------------|-----------|-----------|
| Fever                                                                                                                                                                                                                                                                                                                                                                                                                         | 87.9 [1] | 15 [3]      | 68 [6]    | NR        |
| Fatigue                                                                                                                                                                                                                                                                                                                                                                                                                       | 38.1 [2] | 42 [4]      | 94 [6]    | NR        |
| Dry cough                                                                                                                                                                                                                                                                                                                                                                                                                     | 67.7 [1] | 80 [3]      | 93 [6]    | 22 [10]   |
| Sneezing                                                                                                                                                                                                                                                                                                                                                                                                                      | NR       | 74 [4]      | 58 [7]    | 96 [11]   |
| Malaise                                                                                                                                                                                                                                                                                                                                                                                                                       | 14.8 [1] | 30 [4]      | 94 [6]    | NR        |
| Rhinorrhea                                                                                                                                                                                                                                                                                                                                                                                                                    | 4 [2]    | 95 [3]      | 91 [6]    | 62.1 [12] |
| Sore throat                                                                                                                                                                                                                                                                                                                                                                                                                   | 13.9 [1] | 70 [3]      | 84 [6]    | 30 [10]   |
| Diarrhea                                                                                                                                                                                                                                                                                                                                                                                                                      | 3.7 [1]  | 11 [4]      | 14.4 [8]  | NR        |
| Headache                                                                                                                                                                                                                                                                                                                                                                                                                      | 13.6 [1] | 80 [5]      | 91 [6]    | 50 [13]   |
| Dyspnea                                                                                                                                                                                                                                                                                                                                                                                                                       | 18.6 [1] | 21 [4]      | 63 [9]    | NR        |
| [1]<br><a href="https://www.who.int/docs/default-source/coronaviruse/who-china-joint-mission-on-covid-19-final-report.pdf?sa=D&amp;ust=1585147724205000&amp;usq=AFQjCNHMTMLZYuYavNS7iXN_D8Aajv0Yiw">https://www.who.int/docs/default-source/coronaviruse/who-china-joint-mission-on-covid-19-final-report.pdf?sa=D&amp;ust=1585147724205000&amp;usq=AFQjCNHMTMLZYuYavNS7iXN_D8Aajv0Yiw</a>                                    |          |             |           |           |
| [2]<br><a href="https://www.thelancet.com/action/showPdf?pii=S0140-6736%2820%2930211-7">https://www.thelancet.com/action/showPdf?pii=S0140-6736%2820%2930211-7</a>                                                                                                                                                                                                                                                            |          |             |           |           |
| [3]<br><a href="https://www.sciencedirect.com/science/article/pii/S0095454305703559?via%3Dihub">https://www.sciencedirect.com/science/article/pii/S0095454305703559?via%3Dihub</a>                                                                                                                                                                                                                                            |          |             |           |           |
| [4]<br><a href="https://www.ncbi.nlm.nih.gov/pubmed/3057962">https://www.ncbi.nlm.nih.gov/pubmed/3057962</a>                                                                                                                                                                                                                                                                                                                  |          |             |           |           |
| [5]<br><a href="https://www.ncbi.nlm.nih.gov/pmc/articles/PMC4347877/pdf/nihms658637.pdf">https://www.ncbi.nlm.nih.gov/pmc/articles/PMC4347877/pdf/nihms658637.pdf</a>                                                                                                                                                                                                                                                        |          |             |           |           |
| [6]<br><a href="https://jamanetwork.com/journals/jamainternalmedicine/fullarticle/485554">https://jamanetwork.com/journals/jamainternalmedicine/fullarticle/485554</a>                                                                                                                                                                                                                                                        |          |             |           |           |
| [7]<br><a href="https://www.ncbi.nlm.nih.gov/pmc/articles/PMC4915903/">https://www.ncbi.nlm.nih.gov/pmc/articles/PMC4915903/</a>                                                                                                                                                                                                                                                                                              |          |             |           |           |
| [8]<br><a href="https://www.ncbi.nlm.nih.gov/pmc/articles/PMC4676820/">https://www.ncbi.nlm.nih.gov/pmc/articles/PMC4676820/</a>                                                                                                                                                                                                                                                                                              |          |             |           |           |
| [9]<br><a href="https://www.ncbi.nlm.nih.gov/pmc/articles/PMC3650195/">https://www.ncbi.nlm.nih.gov/pmc/articles/PMC3650195/</a>                                                                                                                                                                                                                                                                                              |          |             |           |           |
| [10]<br><a href="https://www.ncbi.nlm.nih.gov/pubmed/10971479">https://www.ncbi.nlm.nih.gov/pubmed/10971479</a>                                                                                                                                                                                                                                                                                                               |          |             |           |           |
| [11]<br><a href="https://www.ncbi.nlm.nih.gov/pmc/articles/PMC5806744/">https://www.ncbi.nlm.nih.gov/pmc/articles/PMC5806744/</a>                                                                                                                                                                                                                                                                                             |          |             |           |           |
| [12]<br><a href="https://www.researchgate.net/publication/307953143_Inverse_correlation_of_soluble_programmed_cell_death-1_ligand-1_sPD-L1_with_eosinophil_count_and_clinical_severity_in_allergic_rhinitis_patients">https://www.researchgate.net/publication/307953143_Inverse_correlation_of_soluble_programmed_cell_death-1_ligand-1_sPD-L1_with_eosinophil_count_and_clinical_severity_in_allergic_rhinitis_patients</a> |          |             |           |           |
| [13]<br><a href="https://www.ncbi.nlm.nih.gov/pubmed/17300360">https://www.ncbi.nlm.nih.gov/pubmed/17300360</a>                                                                                                                                                                                                                                                                                                               |          |             |           |           |
