# Supplementary material for: Diagnostic Accuracy of Web-Based COVID-19 Symptom Checkers: Comparison Study
Source: PubMed Central journal article supplement (PMC7541039; doi:10.2196/21299), 2020-10-06
Supplement: jmir_v22i10e21299_app3.pdf [file jmir_v22i10e21299_app3.pdf]

### Multimedia Appendix 3. List of the COVID-19 cases

| case | assessor | age | sex    | symptoms                                                                                                                                                                                                                                                  | Source |
|------|----------|-----|--------|-----------------------------------------------------------------------------------------------------------------------------------------------------------------------------------------------------------------------------------------------------------|--------|
| 1    | 1        | 50  | FEMALE | Fever, Diarrhea, Anorexia, Asthenia, Dry Cough, Myalgia, China                                                                                                                                                                                            | 1      |
| 1    | 2        | 50  | FEMALE | Stay in COVID-19 Risk Area, Wuhan, fever, diarrhea, asthenia, anorexia, dry cough, myalgia, C-reactive protein increased, ground glass opacity (CT)                                                                                                       | 1      |
| 1    | 3        | 50  | FEMALE | fever, diarrhea , anorexia, asthenia, Covid-19 risk area, dry cough, muscle ache, increased CRP , ground glass opacities, consolidation                                                                                                                   | 1      |
| 2    | 1        | 10  | FEMALE | Contact COVID-19 Case, Fever, Sputum Production, consolidations, Ground Glass Opacities (CT)                                                                                                                                                              | 2      |
| 2    | 2        | 10  | FEMALE | contact Covid-19 patient , fever, sputum production , consolidations, ground glass opacities                                                                                                                                                              | 2      |
| 2    | 3        | 10  | FEMALE | Contact COVID-19 Case, fever, sputum production, patchy consolidation, ground glass opacity                                                                                                                                                               | 2      |
| 3    | 1        | 33  | FEMALE | Wuhan, Fever, Cough, coarse breath sounds , Leukopenia, C-Reactive Protein Increased, Elevated Sedimentation Rate, D-Dimer Abnormal, Ground Glass Opacities (CT)                                                                                          | 3      |
| 3    | 2        | 33  | FEMALE | fever, cough, Stay in COVID-19 Risk Area, Wuhan, leukopenia, coarse breath sounds, elevated C-reactive protein, Elevated Sedimentation Rate, D-Dimer Abnormal, peripheral ground-glass opacity on CT                                                      | 3      |
| 3    | 3        | 33  | FEMALE | fever, cough, Wuhan, coarse breath sounds, leucopenia, increased CRP, increased erythrocyte sedimentation rate, increased D-dimer, ground glass opacities                                                                                                 | 3      |
| 4    | 1        | 41  | FEMALE | Wuhan, Fever, Ground Glass Opacities (CT)                                                                                                                                                                                                                 | 4      |
| 4    | 2        | 41  | FEMALE | Wuhan, Stay in COVID-19 Risk Area, fever, ground-glass opacity on CT                                                                                                                                                                                      | 4      |
| 4    | 3        | 41  | FEMALE | Wuhan, fever, ground glass opacities                                                                                                                                                                                                                      | 4      |
| 5    | 1        | 32  | MALE   | Wuhan, Fever, coarse breath sounds, Interleukin-6 Increased, right lower lobe consolidation, Bronchiectasis                                                                                                                                               | 5      |
| 5    | 2        | 32  | MALE   | Stay in COVID-19 Risk Area, Wuhan, cough, fever, IL-6 Increased, subpleural right lower lobe consolidation                                                                                                                                                | 5      |
| 5    | 3        | 32  | MALE   | Wuhan, cough, fever, coarse breath sounds, increased interleukin 6 , bronchiectasis, subpleural right lower lobe consolidation                                                                                                                            | 5      |
| 6    | 1        | 45  | FEMALE | Wuhan, Fever, Cough, coarse breath sounds, Neutrophil Count Increased, Lymphocytopenia, Elevated Sedimentation Rate, Interleukin-6 Increased, peripheral consolidation, Pneumonia, crazy-paving pattern                                                   | 5      |
| 6    | 2        | 45  | FEMALE | Wuhan, Stay in COVID-19 Risk Area, cough, fever, Neutrophil Count Increased, lymphopenia, Elevated Sedimentation Rate, IL-6 increased, bilateral peripheral consolidation                                                                                 | 5      |
| 6    | 3        | 45  | FEMALE | Wuhan, cough, fever, coarse breath sounds, increased neutrophil ratio , decreased lymphocyte , increased erythrocyte sedimentation rate, increased interleukin 6 , consolidation, interlobular septal thickening, crazy paving appearance, bronchiectasis | 5      |

|    |   |    |        |                                                                                                                                                                                                                                                                                                                                             |   |
|----|---|----|--------|---------------------------------------------------------------------------------------------------------------------------------------------------------------------------------------------------------------------------------------------------------------------------------------------------------------------------------------------|---|
| 7  | 1 | 42 | MALE   | High Fever, Cough, Fatigue, Bilateral coarse breath sounds, Wet Rales, Leukopenia, Lymphocytes Increased, C-Reactive Protein Increased, Elevated Sedimentation Rate, Amyloid A Protein Increased, Aspartate Transaminase Increased, Alanine Aminotransferase Increased, Ground Glass Appearance, Ground Glass Opacities (CT), consolidation | 6 |
| 7  | 2 | 42 | MALE   | Wuhan, Stay in COVID-19 Risk Area, high fever, cough, fatigue, bilateral coarse breath sounds, wet rales, leukopenia, lymphocytosis, Elevated Sedimentation Rate, C-Reactive Protein Increased, Aspartate Aminotransferase Increased, Alanine Aminotransferase Increased                                                                    | 6 |
| 7  | 3 | 42 | MALE   | Wuhan, fever, cough, fatigue , coarse breath sounds, wet rales , leukopenia, lymphocytosis, increased CRP, increased erythrocyte sedimentation rate, increased serum amyloid A protein, increased aspartate aminotransferase, increased alanine aminotransferase , ground glass opacities, ground glass consolidation                       | 6 |
| 8  | 1 | 63 | FEMALE | Wuhan, Fever, Cough, Dizziness, Constipation, Tachypnea, Rhonchi, Bilateral pneumonia                                                                                                                                                                                                                                                       | 7 |
| 8  | 2 | 63 | FEMALE | Wuhan, Stay in COVID-19 Risk Area, fever, cough, dizziness, constipation, Hyperpnea                                                                                                                                                                                                                                                         | 7 |
| 8  | 3 | 63 | FEMALE | Wuhan, fever , cough, dizziness, constipation, tachypnea , Rhonchi, pneumonia                                                                                                                                                                                                                                                               | 7 |
| 9  | 1 | 63 | MALE   | Contact COVID-19 Case, Fever, Cough, Tachypnea, Rhonchi , Unilateral pneumonia                                                                                                                                                                                                                                                              | 7 |
| 9  | 2 | 63 | MALE   | Contact COVID-19 Case, fever, cough, hyperpnea, Abnormal Chest CT Scan                                                                                                                                                                                                                                                                      | 7 |
| 9  | 3 | 63 | MALE   | contact Covid-19 patient , fever, cough, tachypnea, Rhonchi, pneumonia                                                                                                                                                                                                                                                                      | 7 |
| 10 | 1 | 19 | MALE   | Wuhan, Fever, Cough, Fatigue, Nasal Congestion, Rhinorrhea, Unilateral pneumonia                                                                                                                                                                                                                                                            | 7 |
| 10 | 2 | 19 | MALE   | Wuhan, Stay in COVID-19 Risk Area, fever, cough, fatigue, nasal congestion, rhinorrhea, Abnormal CT scan                                                                                                                                                                                                                                    | 7 |
| 10 | 3 | 19 | MALE   | fever , cough, fatigue , Nasal congestion, Rhinorrhea, pneumonia , COVID-19 Risk Area                                                                                                                                                                                                                                                       | 7 |
| 11 | 1 | 30 | FEMALE | Fever, Chills, Fatigue, Cough, China                                                                                                                                                                                                                                                                                                        | 8 |
| 11 | 2 | 30 | FEMALE | Wuhan, Stay in COVID-19 Risk Area, Contact COVID-19 Case, fever, chills, fatigue, cough                                                                                                                                                                                                                                                     | 8 |
| 11 | 3 | 30 | FEMALE | Covid-19 risk area, contact Covid-19 patient , fever, chills , fatigue, cough                                                                                                                                                                                                                                                               | 8 |
| 12 | 1 | 31 | MALE   | Wuhan, Fever, Chills, Fatigue, Conjunctivitis, Cough                                                                                                                                                                                                                                                                                        | 8 |
| 12 | 2 | 31 | MALE   | Wuhan, Stay in COVID-19 Risk Area, fever, chills, fatigue, conjunctivitis                                                                                                                                                                                                                                                                   | 8 |
| 12 | 3 | 31 | MALE   | fever, chills , fatigue, conjunctivitis, cough, Covid-19 risk area                                                                                                                                                                                                                                                                          | 8 |
| 13 | 1 | 48 | MALE   | Wuhan , Fever, Headache, Cough                                                                                                                                                                                                                                                                                                              | 9 |
| 13 | 2 | 48 | MALE   | Wuhan, Stay in COVID-19 Risk Area, fever, headache, cough                                                                                                                                                                                                                                                                                   | 9 |

|    |   |    |        |                                                                                                                                                                                                                                                                                                                            |    |
|----|---|----|--------|----------------------------------------------------------------------------------------------------------------------------------------------------------------------------------------------------------------------------------------------------------------------------------------------------------------------------|----|
| 13 | 3 | 48 | MALE   | Covid-19 risk area, fever, headache , cough                                                                                                                                                                                                                                                                                | 9  |
| 14 | 1 | 55 | MALE   | Wuhan, Sore Throat, Myalgia, prominent bronchovascular bundle, Fever, Lymphocytopenia, C-Reactive Protein Increased, consolidation of both lower lobes, Ground Glass Opacities (CT)                                                                                                                                        | 10 |
| 14 | 2 | 55 | MALE   | Wuhan, Stay in COVID-19 Risk Area, Contact COVID-19 Case, Fever, sore throat, bilateral patchy consolidation, myalgia                                                                                                                                                                                                      | 10 |
| 14 | 3 | 55 | MALE   | Covid-19 risk area , sore throat, myalgia, prominent bronchovascular bundle, fever, lymphopenia, increased CRP, bilateral patch consolidation, ground glass opacities, interlobular septal thickening                                                                                                                      | 10 |
| 15 | 1 | 50 | MALE   | Fever, Chills, Cough, Fatigue, Dyspnea, Wuhan, Leukopenia, Lymphocytopenia, multiple patchy shadows in both lungs, C-Reactive Protein Increased                                                                                                                                                                            | 11 |
| 15 | 2 | 50 | MALE   | fever, chills, cough, fatigue, dyspnea, Stay in COVID-19 Risk Area, patchy shadow on X-ray                                                                                                                                                                                                                                 | 11 |
| 15 | 3 | 50 | MALE   | fever, chills, cough, fatigue, shortness of breath, Covid-19 risk area , diffuse gridding shadow lung                                                                                                                                                                                                                      | 11 |
| 16 | 1 | 46 | FEMALE | Fever, Sore Throat, Cough, Chest Discomfort, Wuhan, Ground Glass Opacities (CT)                                                                                                                                                                                                                                            | 12 |
| 16 | 2 | 46 | FEMALE | fever, sore throat, cough, chest distress, Stay in COVID-19 Risk Area, Wuhan, ground-glass opacity on CT                                                                                                                                                                                                                   | 12 |
| 16 | 3 | 46 | FEMALE | fever, sore throat , cough , chest distress, Covid-19 risk area , contact Covid-19 patient , ground glass opacities                                                                                                                                                                                                        | 12 |
| 17 | 1 | 34 | FEMALE | Fever, history of hypothyroidism, Vaginal Bleeding, Abdominal Pain, Wuhan, Ground Glass Opacities (CT), Lymphocytopenia, Neutrophil Count Increased, C-Reactive Protein Increased                                                                                                                                          | 13 |
| 17 | 2 | 34 | FEMALE | Wuhan, Stay in COVID-19 Risk Area, fever, ground-glass opacity on CT, lymphopenia, neutrophilia, C-reactive protein increased                                                                                                                                                                                              | 13 |
| 17 | 3 | 34 | FEMALE | Covid-19 risk area, vaginal bleeding, abdominal pain, fever, ground glass opacities, lymphopenia, neutrophilia, increased CRP                                                                                                                                                                                              | 13 |
| 18 | 1 | 52 | MALE   | history of kidney transplantation, Immunosuppressive Therapy, Wuhan, Fatigue, Dyspnea, Dull Chest Pain, Chest Pain, Nausea, Loss of Appetite, Abdominal Pain, Dry Cough, Fever, Headache, Lymphocytopenia, Neutrophil Count Increased, Monocyte Count Increased, C-Reactive Protein Increased, Ground Glass Opacities (CT) | 14 |
| 18 | 2 | 52 | MALE   | immunosuppression, Wuhan, Stay in COVID-19 Risk Area, fatigue, dyspnea, chest tightness, nausea, loss of appetite, abdominal pain, dry cough, fever, headache, lymphopenia, neutrophil count increased, C-reactive protein increased, multiple ground-glass opacity                                                        | 14 |
| 18 | 3 | 52 | MALE   | chronic glomerulonephritis, immunosuppressive therapy, Covid-19 risk area , fatigue, dyspnea, tightness chest, chest pain, nausea, loss of appetite, abdominal pain, dry cough, fever, headache, decreased lymphocytes , increased CRP , ground glass shadow , increased neutrophil count                                  | 14 |
| 19 | 1 | 40 | FEMALE | Fever, Dull Chest Pain, Fatigue, peripheral consolidations, ground-glass opacities in both lungs                                                                                                                                                                                                                           | 15 |
| 19 | 2 | 40 | FEMALE | fever, chest tightness, fatigue, ground glass opacity (CT), cough, leukopenia                                                                                                                                                                                                                                              | 15 |
| 19 | 3 | 40 | FEMALE | fever, chest tightness, fatigue, glucose increased , ground glass opacities, peripheral consolidations, cough, decreased leukocytes, increased CRP                                                                                                                                                                         | 15 |

|    |   |    |        |                                                                                                                                                                                                                                                                 |    |
|----|---|----|--------|-----------------------------------------------------------------------------------------------------------------------------------------------------------------------------------------------------------------------------------------------------------------|----|
| 20 | 1 | 35 | MALE   | Wuhan, Fever, Cough, Neutrophil Count Increased, Lymphocytopenia, Glucose Increased, Ground Glass Appearance, C-Reactive Protein Increased                                                                                                                      | 16 |
| 20 | 2 | 35 | MALE   | Stay in COVID-19 Risk Area, fever, cough, Wuhan, neutrophil count increased, lymphopenia, C-reactive protein increased, multiple patchy consolidations, ground-glass opacity (CT)                                                                               | 16 |
| 20 | 3 | 35 | MALE   | fever, cough, Covid-19 risk area, increased neutrophils, decreased lymphocytes , elevated glucose, increased CRP , consolidation, ground glass opacities                                                                                                        | 16 |
| 21 | 1 | 81 | FEMALE | Abdominal Pain, Diarrhea, Sore Throat, Diamond Princess cruise ship                                                                                                                                                                                             | 17 |
| 21 | 2 | 81 | FEMALE | abdominal pain , sore throat , cruise ship, diarrhea , Japan                                                                                                                                                                                                    | 17 |
| 21 | 3 | 81 | FEMALE | abdominal pain, watery diarrhea, sore throat, Diamond Princess                                                                                                                                                                                                  | 17 |
| 22 | 1 | 35 | FEMALE | Fever, Chills, Myalgia, Wuhan, Nasal Congestion, Cough, Sputum Production                                                                                                                                                                                       | 18 |
| 22 | 2 | 35 | FEMALE | fever, chills, myalgia, Wuhan, Stay in COVID-19 Risk Area, cough, nasal congestion, sputum production                                                                                                                                                           | 18 |
| 22 | 3 | 35 | FEMALE | Covid-19 risk area , fever, chill, myalgia, nasal congestion, cough, sputum production                                                                                                                                                                          | 18 |
| 23 | 1 | 54 | MALE   | Fever, Dry Cough, ground-glass opacities in both lower lobes, China                                                                                                                                                                                             | 19 |
| 23 | 2 | 54 | MALE   | Wuhan, Stay in COVID-19 Risk Area, hypertension, fever, dry cough, ground glass opacity (CT)                                                                                                                                                                    | 19 |
| 23 | 3 | 54 | MALE   | Covid-19 risk area, chills, muscle pain , hypertension, dry cough, consolidation, ground glass opacities                                                                                                                                                        | 19 |
| 24 | 1 | 39 | MALE   | Fever, Sore Throat, Glucose Increased, Ground Glass Opacities (CT)                                                                                                                                                                                              | 16 |
| 24 | 2 | 39 | MALE   | Contact COVID-19 Case, fever, ground-glass opacity (CT)                                                                                                                                                                                                         | 16 |
| 24 | 3 | 39 | MALE   | fever, soar throat , contact Covid-19 patient, , decreased aspartate aminotransferase, elevated glucose, ground glass opacities                                                                                                                                 | 16 |
| 25 | 1 | 39 | MALE   | Cough, frothy white sputum, Bilateral Pulmonary Opacities, Dyspnea, Decreased Oxygen Saturation, Altered Mental Status, Wuhan                                                                                                                                   | 20 |
| 25 | 2 | 39 | MALE   | Wuhan, Stay in COVID-19 Risk Area, fever, cough, sputum production, dyspnea, alteration of consciousness, patchy opacities (CT)                                                                                                                                 | 20 |
| 25 | 3 | 39 | MALE   | Covid-19 risk area, fever, cough , frothy white sputum, shortness of breath, patchy opacities, decreased mental state, decreased SpO2, ground glass opacities, increased albumin , increased Aspartate aminotransferase, increased Lactate dehydrogenase, Wuhan | 20 |
| 26 | 1 | 21 | FEMALE | Cough, Chills, Fever, frothy white sputum, Bilateral Pulmonary Opacities, Wuhan                                                                                                                                                                                 | 21 |
| 26 | 2 | 21 | FEMALE | Contact COVID-19 Case, fever, cough, chills, sputum production, leukopenia, thrombocytopenia                                                                                                                                                                    | 21 |
| 26 | 3 | 21 | FEMALE | Covid-19 risk area, fever, cough, chills, frothy white sputum, patchy opacities, decreased lymphocytes , decreased platelet count                                                                                                                               | 21 |

|    |   |    |        |                                                                                                                                                                                                                                                                                                                                                                                                                          |    |
|----|---|----|--------|--------------------------------------------------------------------------------------------------------------------------------------------------------------------------------------------------------------------------------------------------------------------------------------------------------------------------------------------------------------------------------------------------------------------------|----|
| 27 | 1 | 50 | MALE   | Diabetes Mellitus, Pneumonia, Respiratory Distress, Decreased Oxygen Saturation                                                                                                                                                                                                                                                                                                                                          | 22 |
| 27 | 2 | 50 | MALE   | diabetes mellitus, hyperlipidemia, respiratory distress                                                                                                                                                                                                                                                                                                                                                                  | 22 |
| 27 | 3 | 50 | MALE   | diabetes mellitus, pneumonia, respiratory distress                                                                                                                                                                                                                                                                                                                                                                       | 22 |
| 28 | 1 | 47 | FEMALE | Wuhan, Lethargy, Sore Throat, Dry Cough, Pleuritic Pain, Dyspnea, Fever, Bilateral Pulmonary Infiltrate, C-Reactive Protein Increased                                                                                                                                                                                                                                                                                    | 23 |
| 28 | 2 | 47 | FEMALE | Wuhan, lethargy, sore throat, dry cough, pleuritic chest pain, dyspnea, fever, tachycardia, C-reactive protein increased, bilaterally patchy infiltration                                                                                                                                                                                                                                                                | 23 |
| 28 | 3 | 47 | FEMALE | Covid-19 risk area, lethargy, sore throat, dry cough, pleuritic chest pain , dyspnea, fever, rhonchi, increased CRP, pulmonary infiltrate                                                                                                                                                                                                                                                                                | 23 |
| 29 | 1 | 32 | MALE   | Fever, Fatigue, Dizziness, Constipation, Rhonchi , Tachypnea, Bilateral pneumonia                                                                                                                                                                                                                                                                                                                                        | 7  |
| 29 | 2 | 32 | MALE   | fever, fatigue, dizziness, constipation, rhonchi on auscultation, hyperpnea, CT scan abnormal                                                                                                                                                                                                                                                                                                                            | 7  |
| 29 | 3 | 32 | MALE   | Covid-19 risk area, fever, fatigue , dizziness , Constipation, Rhonchi, tachypnea , pneumonia                                                                                                                                                                                                                                                                                                                            | 7  |
| 30 | 1 | 64 | MALE   | Fever, Dizziness, Headache, Malaise, Wuhan, bilateral multiple ground-glass opacities                                                                                                                                                                                                                                                                                                                                    | 24 |
| 30 | 2 | 64 | MALE   | fever, dizziness, headache, myalgia, Wuhan, Stay in COVID-19 Risk Area, ground-glass opacity                                                                                                                                                                                                                                                                                                                             | 24 |
| 30 | 3 | 64 | MALE   | ground glass opacities, fever, dizziness, headache, aching limbs , Covid-19 risk area                                                                                                                                                                                                                                                                                                                                    | 24 |
| 31 | 1 | 79 | FEMALE | history of coronary artery disease , Hypertension, Congestive Heart Failure, Syncope, Myalgia, Fever, Cough, Lymphocytopenia, Chills, Ground Glass Opacities (CT)                                                                                                                                                                                                                                                        | 25 |
| 31 | 2 | 79 | FEMALE | coronary artery disease, hypertension, myalgia, cough, fever, altered consciousness, lymphopenia, chills, ground-glass opacity (CT)                                                                                                                                                                                                                                                                                      | 25 |
| 31 | 3 | 79 | FEMALE | coronary artery disease , hypertension, myalgia, cough , fever, lymphopenia, chills, ground glass opacities                                                                                                                                                                                                                                                                                                              | 25 |
| 32 | 1 | 75 | MALE   | End Stage Renal Disease, Wuhan, Cough, Dull Chest Pain, Hypertension, Heart Failure, Chronic Obstructive Pulmonary Disease, pitting edema bilaterally, Ground Glass Opacities (CT), Decreased Oxygen Saturation                                                                                                                                                                                                          | 26 |
| 32 | 2 | 75 | MALE   | Wuhan, Stay in COVID-19 Risk Area, end-stage kidney disease, cough, chest tightness, hypertension, Chronic obstructive pulmonary disease, hyperpnea                                                                                                                                                                                                                                                                      | 26 |
| 32 | 3 | 75 | MALE   | Covid-19 risk area, cough , chest tightness, hypertension, chronic heart failure, COPD, End Stage Kidney Disease, tachypnea , pitting edema, ground glass opacity, decreased oxygen saturation, CRP increased, Wuhan                                                                                                                                                                                                     | 26 |
| 33 | 1 | 53 | FEMALE | Fatigue, Fever, Cough, Hypotension, Alkalosis, Hypoxemia, Hypocapnia, Low-Voltage Electrocardiogram, ST-segment depression with T-wave inversion in lead V1 and aVR, Creatine Phosphokinase Increased, C-Reactive Protein Increased, Chloride Decreased, Potassium Increased, Hyponatremia, Lymphocytopenia, Hemoglobin Increased, Hematocrit Increased, Erythrocytes Increased, ST Elevation, Cardiac Enzymes Increased | 27 |
| 33 | 2 | 53 | FEMALE | fatigue, fever, cough, hypotension, tachycardia, C-reactive protein increased                                                                                                                                                                                                                                                                                                                                            | 27 |

|    |   |    |        |                                                                                                                                                                                                                                                                                                                                                                                                                          |    |
|----|---|----|--------|--------------------------------------------------------------------------------------------------------------------------------------------------------------------------------------------------------------------------------------------------------------------------------------------------------------------------------------------------------------------------------------------------------------------------|----|
| 33 | 3 | 53 | FEMALE | fatigue, fever, dry cough, hypotension , alkalosis, increased creatine kinase, increased CRP, hyperkalemia, heart dysfunction                                                                                                                                                                                                                                                                                            | 27 |
| 34 | 1 | 73 | FEMALE | Diabetes Mellitus, Obesity, Chronic Kidney Insufficiency, Hypertension, Congestive Heart Failure, Cough, Fever, Dyspnea, Hypoxemia, Tachycardia, Respiratory Failure, Bilateral Pulmonary Infiltrate                                                                                                                                                                                                                     | 28 |
| 34 | 2 | 73 | FEMALE | cough, fever, dyspnea, hypoxemia, tachycardia, bilateral infiltrates CT                                                                                                                                                                                                                                                                                                                                                  | 28 |
| 34 | 3 | 73 | FEMALE | coronary artery disease, hypertension, congestive heart failure, cough, fever, shortness of breath, tachycardia , respiratory failure, bilateral infiltrates, diabetes mellitus, hypoxemia, chronic kidney disease                                                                                                                                                                                                       | 28 |
| 35 | 1 | 38 | MALE   | Fever, Lymphocytopenia, Cough, Decreased Oxygen Saturation, Dull Chest Pain, Palpitations, Dyspnea, Hypoxemia, Ground Glass Opacities (CT), consolidation, Acute Respiratory Distress Syndrome, Pulmonary Emphysema                                                                                                                                                                                                      | 29 |
| 35 | 2 | 38 | MALE   | Wuhan, Stay in COVID-19 Risk Area, fever, lymphopenia, cough, hypoxemia, chest tightness, dyspnea, Ground Glass Opacities (CT)                                                                                                                                                                                                                                                                                           | 29 |
| 35 | 3 | 38 | MALE   | Covid-19 risk area , hearing loss, tinnitus, fever, decreased lymphocytes , cough, decreased oxygen saturation , chest tightness , dyspnea, hypoxemia, ground glass opacities, pulmonary lesion , consolidation                                                                                                                                                                                                          | 29 |
| 36 | 1 | 51 | MALE   | Italy, Fever, Cough, Myalgia, Malaise, Sinusitis, Sputum Production, bilateral scleral injection, Hypertension, Lymphocytopenia                                                                                                                                                                                                                                                                                          | 30 |
| 36 | 2 | 51 | MALE   | fever, cough, Stay in COVID-19 Risk Area, myalgia, malaise, sputum production                                                                                                                                                                                                                                                                                                                                            | 30 |
| 36 | 3 | 51 | MALE   | fever , cough, myalgia, malaise, sinusitis, sputum production , Covid-19 risk area, hypertension                                                                                                                                                                                                                                                                                                                         | 30 |
| 37 | 1 | 39 | MALE   | history of non-Hodgkin lymphoma, history of chronic lymphocytic leukaemia, China, Fever, Sore Throat, Productive Cough, Dyspnea, Leukocytes Increased, Lymphocytes Increased, Hemoglobin Decreased, Decreased Platelet Count, C-Reactive Protein Increased, $\beta$ 2-microglobulin increased, Lactate Dehydrogenase Increased, Immunoglobulins Decreased or Undetectable, Ground Glass Opacities (CT), Pleural Effusion | 31 |
| 37 | 2 | 39 | MALE   | Stay in COVID-19 Risk Area, non-Hodgkin Lymphoma, fever, sore throat, productive cough, dyspnea, immunosuppression, lymphocytosis, thrombocytopenia, C-reactive protein increased, Ground Glass Opacities (CT)                                                                                                                                                                                                           | 31 |
| 37 | 3 | 39 | MALE   | non-Hodgkin lymphoma, chronic lymphocytic leukaemia, fever, sore throat , productive cough, dyspnoea, increased CRP, lymphocytosis, thrombocytopenia, increased leukocytes , increased lactate dehydrogenase, decreased platelet count, ground glass opacities , Covid-19 risk area, China                                                                                                                               | 31 |
| 38 | 1 |    | MALE   | Fever, Lethargy, cutaneous mottling, Respiratory Distress, Contact COVID-19 Case                                                                                                                                                                                                                                                                                                                                         | 32 |
| 38 | 2 |    | MALE   | fever, lethargy, respiratory distress                                                                                                                                                                                                                                                                                                                                                                                    | 32 |
| 38 | 3 |    | MALE   | fever, lethargy, cutaneous mottling, respiratory distress, tachycardia, tachypnoea, contact Covid-19 patient, Iran                                                                                                                                                                                                                                                                                                       | 32 |
| 39 | 1 | 27 | FEMALE | Contact COVID-19 Case, Fever, Myalgia, Cough, Lymphocytopenia, C-Reactive Protein Increased, Pneumonia                                                                                                                                                                                                                                                                                                                   | 33 |
| 39 | 2 | 27 | FEMALE | Contact COVID-19 Case, fever, myalgia, cough, C-reactive protein increased, CT scan abnormal                                                                                                                                                                                                                                                                                                                             | 33 |
| 39 | 3 | 27 | FEMALE | contact Covid-19 patient , fever, myalgia, cough, lymphocytopenia, increased CRP, pneumonia                                                                                                                                                                                                                                                                                                                              | 33 |

|    |   |    |         |                                                                                                                                                                                                                                                                                    |    |
|----|---|----|---------|------------------------------------------------------------------------------------------------------------------------------------------------------------------------------------------------------------------------------------------------------------------------------------|----|
| 40 | 1 | 26 | FEMALE  | Contact COVID-19 Case, Fever, Myalgia, Malaise, Cough, Sore Throat, Lymphocytopenia, C-Reactive Protein Increased, Pneumonia                                                                                                                                                       | 33 |
| 40 | 2 | 26 | FEMALE  | Contact COVID-19 Case, fever, myalgia, malaise, cough, sore throat, lymphopenia, C-reactive protein increased, CT scan abnormal                                                                                                                                                    | 33 |
| 40 | 3 | 26 | FEMALE  | contact Covid-19 patient, fever, myalgia, malaise, cough, sore throat, Lymphopenia, increased CRP, pneumonia                                                                                                                                                                       | 33 |
| 41 | 1 | 61 | MALE    | Fever, Dry Cough, Dyspnea, feeling very tired, Malaise, Hypertension, Tachycardia, Chest x-ray shows bilateral lung infiltrates, Ground Glass Opacities (CT), Respiratory Distress                                                                                                 | 34 |
| 41 | 2 | 61 | MALE    | fever, dry cough, dyspnea, fatigue, malaise, hypertension, tachycardia, ground-glass opacity on CT, respiratory distress                                                                                                                                                           | 34 |
| 41 | 3 | 61 | MALE    | fever, dry cough, difficulty breathing, fatigue, malaise, bilateral lung infiltrates, ground glass opacity, respiratory distress, hypertension                                                                                                                                     | 34 |
| 42 | 1 | 26 | FEMALE  | Sore Throat, Dry Cough                                                                                                                                                                                                                                                             | 34 |
| 42 | 2 | 26 | FEMALE  | sore throat, dry cough                                                                                                                                                                                                                                                             | 34 |
| 42 | 3 | 26 | FEMALE  | sore throat, dry cough                                                                                                                                                                                                                                                             | 34 |
| 43 | 1 |    | UNKNOWN | Fever, Sore Throat, Myalgia, ground glass opacity of inferior lobe of left lung                                                                                                                                                                                                    | 35 |
| 43 | 2 |    | UNKNOWN | fever, sore throat, myalgia, ground-glass opacity on CT                                                                                                                                                                                                                            | 35 |
| 43 | 3 |    | UNKNOWN | fever, sore throat, muscle pain, ground glass opacity                                                                                                                                                                                                                              | 35 |
| 44 | 1 |    | UNKNOWN | multiple patchy ground glass opacity in both lungs, effusion on both lungs, Fever, Dry Cough, Productive Cough, Headache, Fatigue                                                                                                                                                  | 35 |
| 44 | 2 |    | UNKNOWN | Fever, dry cough, productive cough, headache, fatigue, ground-glass opacity on CT                                                                                                                                                                                                  | 35 |
| 44 | 3 |    | UNKNOWN | fever, dry cough, productive cough, headache, fatigue , ground glass opacity, effusion on both lungs                                                                                                                                                                               | 35 |
| 45 | 1 |    | UNKNOWN | Fever, multiple patchy ground glass opacity on both lungs                                                                                                                                                                                                                          | 35 |
| 45 | 2 |    | UNKNOWN | ground-glass opacity on CT, Fever                                                                                                                                                                                                                                                  | 35 |
| 45 | 3 |    | UNKNOWN | fever, CT ground glass opacity                                                                                                                                                                                                                                                     | 35 |
| 46 | 1 |    | UNKNOWN | multiple patchy ground glass opacity on both lungs, Fever, Sore Throat, Dry Cough, Headache, Fatigue                                                                                                                                                                               | 35 |
| 46 | 2 |    | UNKNOWN | Fever, Sore throat, dry cough, headache, fatigue, ground-glass opacity on CT                                                                                                                                                                                                       | 35 |
| 46 | 3 |    | UNKNOWN | fever, sore throat, dry cough, headache, fatigue, ground glass opacity                                                                                                                                                                                                             | 35 |
| 47 | 1 | 32 | MALE    | Diarrhea, Fatigue, Cough, Dyspnea, Wuhan, foamy sputum, Tachypnea, Leukocytes Increased, Neutrophil Count Increased, Lymphocytopenia, C-Reactive Protein Increased, Elevated Sedimentation Rate, Glucose Increased, Alanine Aminotransferase Increased, Aspartate Aminotransferase | 36 |

|    |   |    |        |                                                                                                                                                                                                                                                                                                                                                                                                                                                                                                |    |
|----|---|----|--------|------------------------------------------------------------------------------------------------------------------------------------------------------------------------------------------------------------------------------------------------------------------------------------------------------------------------------------------------------------------------------------------------------------------------------------------------------------------------------------------------|----|
|    |   |    |        | Increased, Blood Urea Nitrogen Increased, procalcitonin increased, diffuse multiple patchy exudates, Ground Glass Opacities (CT), Hypercapnia, Hypoxemia, Base Deficit, HCO <sub>3</sub> <sup>-</sup> decreased, Lactate Increased, Acidosis, Thrombocytosis                                                                                                                                                                                                                                   |    |
| 47 | 2 | 32 | MALE   | diarrhea, fatigue, dyspnea, Wuhan, hyperpnea, leukocytosis, neutrophil count increased, lymphocyte count increased, C-reactive protein increased, Erythrocyte sedimentation rate increased, alanine aminotransferase increased, aspartate aminotransferase increased, ground-glass opacities on CT                                                                                                                                                                                             | 36 |
| 47 | 3 | 32 | MALE   | diarrhea, fatigue, cough, dyspnea , Wuhan, sputum production , tachypnea , increased leucocytes , increased neutrophil count , increased lymphocyte count, increased CRP, increased erythrocyte sedimentation rate , increased glucose , increased alanine aminotransferase, increased aspartate aminotransferase, increased blood urea nitrogen, increased procalcitonin, multiple patchy exudates, acidosis, decreased PO <sub>2</sub> , increased PCO <sub>2</sub> , ground glass opacities | 36 |
| 48 | 1 | 48 | MALE   | Smoking, Diabetes Mellitus, Chronic Obstructive Pulmonary Disease, Fever, Cough, foamy sputum, Leukocytes Increased, Lymphocytopenia, Neutrophil Count Increased, Lactate Increased, Alanine Aminotransferase Increased, Bilirubin Increased, Plasma Fibrinogen Increased, Fibrin Degradation Products Increased, C-Reactive Protein Increased, Immunoglobulin G Increased, diffuse multiple patchy exudates with partial interlobar septation, Hypoxemia, Hypercapnia                         | 36 |
| 48 | 2 | 48 | MALE   | smoking, Chronic obstructive pulmonary disease, fever, productive cough, chills, diabetes mellitus, patchy exudates on CT, leukocytosis, neutrophil count increased, lactate dehydrogenase increased, alanine aminotransferase increased, fibrinogen increased, C-reactive protein increased                                                                                                                                                                                                   | 36 |
| 48 | 3 | 48 | MALE   | fever, cough, shivering, sputum production , leukocytes increased , lymphocytes decreased , neutrophil count increased , lactate increased , increased Alanine aminotransferase, bilirubin increased , LDH increased, fibrinogen increased, CRP increased, Immunoglobulin G decreased , smoker, Diabetes mellitus , COPD                                                                                                                                                                       | 36 |
| 49 | 1 | 82 | FEMALE | Tachypnea, Diarrhea, Contact COVID-19 Case, Loss of Appetite, Abdominal Distension, Decreased Oxygen Saturation, Coarse Rales, Alkalosis, Leukocytes Decreased, Lymphocytopenia, Neutrophil Count Decreased, Decreased Platelet Count, C-Reactive Protein Increased, Immunoglobulin G Increased, Hypoxemia, decreased HCO <sub>3</sub> <sup>-</sup> , bilateral ground glass opacities, peripheral exudative changes                                                                           | 36 |
| 49 | 2 | 82 | FEMALE | Contact covid-19 case, abdominal pain, tachypnea, leukopenia, lymphopenia, neutropenia, ground-glass opacities on CT, thrombocytopenia                                                                                                                                                                                                                                                                                                                                                         | 36 |
| 49 | 3 | 82 | FEMALE | contact Covid-19 patient, Diarrhea, Nausea, decreased leukocytes , decreased lymphocytes , decreased Neutrophil count, Platelet count decreased, CRP increased , ground glass opacity, loss of appetite , abdominal distension, decreased oxygen saturation , tachypnea , alkalosis , decreased PaO <sub>2</sub> , HCO <sub>3</sub> <sup>-</sup> decreased                                                                                                                                     | 36 |
| 50 | 1 | 60 | MALE   | Hypertension, Nausea, Vomiting, Diarrhea, Fever, Dyspnea, Thrombocytopenia, bilateral parenchymal opacities, basal pleural effusions, Tachypnea, Hypoxemia                                                                                                                                                                                                                                                                                                                                     | 37 |
| 50 | 2 | 60 | MALE   | Italy, hypertension, nausea, vomiting, diarrhea, fever, dyspnea, thrombocytopenia, bilateral parenchymal opacities on X-ray                                                                                                                                                                                                                                                                                                                                                                    | 37 |
| 50 | 3 | 60 | MALE   | Italy , hypertension, Nausea, vomiting, diarrhoea, fever, dyspnoea , thrombocytopenia, bilateral parenchymal opacities, pleural effusions                                                                                                                                                                                                                                                                                                                                                      | 37 |



| Source | URL                                                                                                                                                                                                                                                                                   |
|--------|---------------------------------------------------------------------------------------------------------------------------------------------------------------------------------------------------------------------------------------------------------------------------------------|
| 1      | <a href="http://balkanmedicaljournal.org/uploads/pdf/pdf_BMJ_2192.pdf">http://balkanmedicaljournal.org/uploads/pdf/pdf_BMJ_2192.pdf</a>                                                                                                                                               |
| 2      | <a href="https://jkms.org/DOIx.php?id=10.3346/jkms.2020.35.e124">https://jkms.org/DOIx.php?id=10.3346/jkms.2020.35.e124</a>                                                                                                                                                           |
| 3      | <a href="https://pubs.rsna.org/doi/10.1148/radiol.2020200236?url_ver=Z39.88-2003&amp;rfr_id=ori:rid:crossref.org&amp;rfr_dat=cr_pub%3dpubmed">https://pubs.rsna.org/doi/10.1148/radiol.2020200236?url_ver=Z39.88-2003&amp;rfr_id=ori:rid:crossref.org&amp;rfr_dat=cr_pub%3dpubmed</a> |
| 4      | <a href="https://pubs.rsna.org/doi/10.1148/radiol.2020200257?url_ver=Z39.88-2003&amp;rfr_id=ori:rid:crossref.org&amp;rfr_dat=cr_pub%3dpubmed">https://pubs.rsna.org/doi/10.1148/radiol.2020200257?url_ver=Z39.88-2003&amp;rfr_id=ori:rid:crossref.org&amp;rfr_dat=cr_pub%3dpubmed</a> |
| 5      | <a href="https://pubs.rsna.org/doi/10.1148/radiol.2020200280?url_ver=Z39.88-2003&amp;rfr_id=ori:rid:crossref.org&amp;rfr_dat=cr_pub%3dpubmed">https://pubs.rsna.org/doi/10.1148/radiol.2020200280?url_ver=Z39.88-2003&amp;rfr_id=ori:rid:crossref.org&amp;rfr_dat=cr_pub%3dpubmed</a> |
| 6      | <a href="https://pubs.rsna.org/doi/10.1148/radiol.2020200269?url_ver=Z39.88-2003&amp;rfr_id=ori:rid:crossref.org&amp;rfr_dat=cr_pub%3dpubmed">https://pubs.rsna.org/doi/10.1148/radiol.2020200269?url_ver=Z39.88-2003&amp;rfr_id=ori:rid:crossref.org&amp;rfr_dat=cr_pub%3dpubmed</a> |
| 7      | <a href="https://www.jstage.jst.go.jp/article/bst/14/1/14_2020.01030/_pdf/-char/en">https://www.jstage.jst.go.jp/article/bst/14/1/14_2020.01030/_pdf/-char/en</a>                                                                                                                     |
| 8      | <a href="https://www.ncbi.nlm.nih.gov/pmc/articles/PMC7029452/#!po=32.1429">https://www.ncbi.nlm.nih.gov/pmc/articles/PMC7029452/#!po=32.1429</a>                                                                                                                                     |
| 9      | <a href="https://www.ncbi.nlm.nih.gov/pmc/articles/PMC7029452/#!po=17.8571">https://www.ncbi.nlm.nih.gov/pmc/articles/PMC7029452/#!po=17.8571</a>                                                                                                                                     |
| 10     | <a href="https://www.ncbi.nlm.nih.gov/pmc/articles/PMC7036338/">https://www.ncbi.nlm.nih.gov/pmc/articles/PMC7036338/</a>                                                                                                                                                             |
| 11     | <a href="https://www.thelancet.com/journals/lanres/article/PIIS2213-2600(20)30076-X/fulltext">https://www.thelancet.com/journals/lanres/article/PIIS2213-2600(20)30076-X/fulltext</a>                                                                                                 |
| 12     | <a href="https://www.ijidonline.com/article/S1201-9712(20)30122-3/pdf">https://www.ijidonline.com/article/S1201-9712(20)30122-3/pdf</a>                                                                                                                                               |
| 13     | <a href="https://www.ncbi.nlm.nih.gov/pubmed/32161941">https://www.ncbi.nlm.nih.gov/pubmed/32161941</a>                                                                                                                                                                               |
| 14     | <a href="https://onlinelibrary.wiley.com/doi/epdf/10.1111/ajt.15869">https://onlinelibrary.wiley.com/doi/epdf/10.1111/ajt.15869</a>                                                                                                                                                   |
| 15     | <a href="https://www.ncbi.nlm.nih.gov/pubmed/32100486">https://www.ncbi.nlm.nih.gov/pubmed/32100486</a>                                                                                                                                                                               |
| 16     | <a href="https://www.ncbi.nlm.nih.gov/pmc/articles/PMC7039714/">https://www.ncbi.nlm.nih.gov/pmc/articles/PMC7039714/</a>                                                                                                                                                             |
| 17     | <a href="https://www.ncbi.nlm.nih.gov/pubmed/32188528">https://www.ncbi.nlm.nih.gov/pubmed/32188528</a>                                                                                                                                                                               |
| 18     | <a href="https://www.ncbi.nlm.nih.gov/pmc/articles/PMC7036342/">https://www.ncbi.nlm.nih.gov/pmc/articles/PMC7036342/</a>                                                                                                                                                             |
| 19     | <a href="https://www.ncbi.nlm.nih.gov/pmc/articles/PMC7025910/">https://www.ncbi.nlm.nih.gov/pmc/articles/PMC7025910/</a>                                                                                                                                                             |
| 20     | <a href="https://www.ncbi.nlm.nih.gov/pmc/articles/PMC7033720/">https://www.ncbi.nlm.nih.gov/pmc/articles/PMC7033720/</a>                                                                                                                                                             |
| 21     | <a href="https://www.ncbi.nlm.nih.gov/pmc/articles/PMC7033720/#!po=31.8182">https://www.ncbi.nlm.nih.gov/pmc/articles/PMC7033720/#!po=31.8182</a>                                                                                                                                     |
| 22     | <a href="https://annals.org/aim/fullarticle/2763329/covid-19-risk-health-care-workers-case-report">https://annals.org/aim/fullarticle/2763329/covid-19-risk-health-care-workers-case-report</a>                                                                                       |
| 23     | <a href="https://www.nature.com/articles/s41591-020-0819-2">https://www.nature.com/articles/s41591-020-0819-2</a>                                                                                                                                                                     |
| 24     | <a href="https://link.springer.com/article/10.1007%2Fs11604-020-00945-1">https://link.springer.com/article/10.1007%2Fs11604-020-00945-1</a>                                                                                                                                           |
| 25     | <a href="http://rimed.org/rimedicaljournal/2020/04/2020-04-50-case-tape.pdf">http://rimed.org/rimedicaljournal/2020/04/2020-04-50-case-tape.pdf</a>                                                                                                                                   |
| 26     | <a href="https://www.karger.com/Article/FullText/507261">https://www.karger.com/Article/FullText/507261</a>                                                                                                                                                                           |
| 27     | <a href="https://jamanetwork.com/journals/jamacardiology/fullarticle/2763843">https://jamanetwork.com/journals/jamacardiology/fullarticle/2763843</a>                                                                                                                                 |
| 28     | <a href="https://www.cdc.gov/mmwr/volumes/69/wr/mm6912e1.htm?s_cid=mm6912e1_w">https://www.cdc.gov/mmwr/volumes/69/wr/mm6912e1.htm?s_cid=mm6912e1_w</a>                                                                                                                               |
| 29     | <a href="https://www.kjronline.org/DOIx.php?id=10.3348/kjr.2020.0180">https://www.kjronline.org/DOIx.php?id=10.3348/kjr.2020.0180</a>                                                                                                                                                 |
| 30     | <a href="https://www.journalofinfection.com/article/S0163-4453(20)30148-1/fulltext">https://www.journalofinfection.com/article/S0163-4453(20)30148-1/fulltext</a>                                                                                                                     |
| 31     | <a href="https://www.thelancet.com/journals/lanhae/article/PIIS2352-3026(20)30074-0/fulltext">https://www.thelancet.com/journals/lanhae/article/PIIS2352-3026(20)30074-0/fulltext</a>                                                                                                 |
| 32     | <a href="https://www.ncbi.nlm.nih.gov/pubmed/32233816">https://www.ncbi.nlm.nih.gov/pubmed/32233816</a>                                                                                                                                                                               |
| 33     | <a href="https://www.thelancet.com/journals/lancet/article/PIIS0140-6736(20)30360-3/fulltext">https://www.thelancet.com/journals/lancet/article/PIIS0140-6736(20)30360-3/fulltext</a>                                                                                                 |
| 34     | <a href="https://bestpractice.bmj.com/topics/en-gb/3000168/case-history">https://bestpractice.bmj.com/topics/en-gb/3000168/case-history</a>                                                                                                                                           |

|    |                                                                                                                                                                                                                                                                                                                                                                           |
|----|---------------------------------------------------------------------------------------------------------------------------------------------------------------------------------------------------------------------------------------------------------------------------------------------------------------------------------------------------------------------------|
| 35 | <a href="https://www.cambridge.org/core/services/aop-cambridge-core/content/view/BBE978EC4E1C2664DE599BA639088BF7/S193578932000066Xa.pdf/case_report_on_early_diagnosis_of_covid19.pdf">https://www.cambridge.org/core/services/aop-cambridge-core/content/view/BBE978EC4E1C2664DE599BA639088BF7/S193578932000066Xa.pdf/case_report_on_early_diagnosis_of_covid19.pdf</a> |
| 36 | <a href="https://www.sciencedirect.com/science/article/pii/S0929664620301443?via%3Dihub">https://www.sciencedirect.com/science/article/pii/S0929664620301443?via%3Dihub</a>                                                                                                                                                                                               |
| 37 | <a href="https://smw.ch/article/doi/smw.2020.20246">https://smw.ch/article/doi/smw.2020.20246</a>                                                                                                                                                                                                                                                                         |
