# Supplementary material for: Diagnostic Accuracy of Web-Based COVID-19 Symptom Checkers: Comparison Study
Source: PubMed Central journal article supplement (PMC7541039; doi:10.2196/21299), 2020-10-06
Supplement: jmir_v22i10e21299_app4.pdf [file jmir_v22i10e21299_app4.pdf]

Multimedia Appendix 4. List of COVID-19 symptoms according to the WHO

|            |             |          |          |         |
|------------|-------------|----------|----------|---------|
| Fever      | Fatigue     | Cough    | Sneezing | Malaise |
| Rhinorrhea | Sore throat | Diarrhea | Headache | Dyspnea |
