# Supplementary material for: Diagnostic Accuracy of Web-Based COVID-19 Symptom Checkers: Comparison Study
Source: PubMed Central journal article supplement (PMC7541039; doi:10.2196/21299), 2020-10-06
Supplement: jmir_v22i10e21299_app5.pdf [file jmir_v22i10e21299_app5.pdf]

Multimedia Appendix 5. Mapping between symptom checkers output texts and risk levels. All mappings were independently done by two different persons and conflicts resolved by a third person's opinion.

|                  |                                                                                                                                                                                                                                                                                                                                                                     |        |
|------------------|---------------------------------------------------------------------------------------------------------------------------------------------------------------------------------------------------------------------------------------------------------------------------------------------------------------------------------------------------------------------|--------|
| Ada              | Your symptoms <b>are probably caused by other diseases</b> that are more common than COVID-19                                                                                                                                                                                                                                                                       | Low    |
|                  | It's <b>unlikely</b> that you're experiencing symptoms of COVID-19                                                                                                                                                                                                                                                                                                  | Low    |
|                  | Based on what you've reported, you should take steps to monitor your health and practice social distancing. You have <b>none of the typical symptoms of COVID-19</b> . However, in the last 14 days, you've been in contact with a confirmed or probable COVID-19 case. Also, you're in one of the groups at risk of developing a more serious form of the disease. | Medium |
|                  | The symptoms you have reported are <b>present in some cases</b> of COVID-19. You haven't reported exposure to cases of COVID-19. However, you are in one of the groups at risk of developing a more serious form of the disease.                                                                                                                                    | Medium |
|                  | You have <b>symptoms typical of COVID-19</b> , and you're in one of the groups at risk of having a more serious form of the disease.                                                                                                                                                                                                                                | Medium |
|                  | It's <b>possible that COVID-19</b> is causing your symptoms                                                                                                                                                                                                                                                                                                         | Medium |
|                  | There is a <b>high risk</b> that COVID-19 is causing your symptoms                                                                                                                                                                                                                                                                                                  | High   |
| Apple            | You Should Practice Social Distancing                                                                                                                                                                                                                                                                                                                               | Low    |
|                  | You Should Self-Isolate                                                                                                                                                                                                                                                                                                                                             | Medium |
|                  | Contact Your Healthcare Provider                                                                                                                                                                                                                                                                                                                                    | High   |
| Babylon          | It's <b>unlikely</b> that you are experiencing symptoms of coronavirus (COVID-19). But if you develop a new or continuous cough, fever or difficulty breathing, start a new symptom check.                                                                                                                                                                          | Low    |
|                  | The symptoms you mentioned sound worrying and <b>could be caused</b> by coronavirus (COVID-19). Call 999 for an ambulance immediately and let them know you may have symptoms of coronavirus.                                                                                                                                                                       | Medium |
| CDC              | Sorry you're feeling ill. Stay at home and monitor your symptoms. Call your provider if you get worse (No COVID-19 risk)                                                                                                                                                                                                                                            | Low    |
|                  | Stay home and take care of yourself. Call your provider if you get worse. You have one or more symptom that <b>may be related</b> to COVID-19                                                                                                                                                                                                                       | Medium |
| Cleveland Clinic | You're at <b>low risk</b> for COVID-19.                                                                                                                                                                                                                                                                                                                             | Low    |
|                  | You're at <b>medium risk</b> for COVID-19.                                                                                                                                                                                                                                                                                                                          | Medium |
|                  | You're at <b>high risk</b> for COVID-19.                                                                                                                                                                                                                                                                                                                            | High   |
| Docyet           | "Es besteht kein Grund zur Sorge! Basierend auf Ihren Angaben ist es <b>ziemlich unwahrscheinlich</b> , dass Sie sich mit dem Coronavirus infiziert haben. Sie zeigen keine Symptome von COVID-19.                                                                                                                                                                  | Low    |
|                  | Aktuell besteht kein wesentlicher Grund zur Sorge. Basierend auf Ihren Angaben ist es <b>ziemlich unwahrscheinlich</b> , dass Sie sich mit dem Coronavirus infiziert haben.                                                                                                                                                                                         | Low    |
|                  | Aktuell besteht kein wesentlicher Grund zur Sorge. Basierend auf Ihren Angaben ist es <b>relativ unwahrscheinlich</b> , dass Sie sich mit dem Coronavirus infiziert haben. Sie schildern jedoch einige typische Symptome eines Atemwegsinfekts (z.B. Grippe, Bronchitis) oder einer Erkältung.                                                                      | Low    |

|             |                                                                                                                                                                                                                                                                                                                                                                                                                      |        |
|-------------|----------------------------------------------------------------------------------------------------------------------------------------------------------------------------------------------------------------------------------------------------------------------------------------------------------------------------------------------------------------------------------------------------------------------|--------|
|             | Sie sollten dringend ärztliche Hilfe aufsuchen. Sie haben typische Symptome einer schweren Grippe oder Lungenentzündung geschildert. Auf Basis Ihrer Angaben ist es jedoch <b>nicht sehr wahrscheinlich</b> , dass Sie sich mit dem Coronavirus infiziert haben.                                                                                                                                                     | Low    |
|             | Sie zeigen deutliche grippeähnliche Symptome und waren potentiell in Kontakt mit am Coronavirus infizierten Personen. Es ist <b>daher möglich</b> , dass auch Sie sich angesteckt haben.                                                                                                                                                                                                                             | Medium |
|             | Sie zeigen erste grippeähnliche Symptome und waren potentiell in Kontakt mit am Coronavirus infizierten Personen. Es ist <b>daher möglich</b> , dass auch Sie sich angesteckt haben.                                                                                                                                                                                                                                 | Medium |
|             | "Bisher zeigen Sie keine auffälligen Symptome. Sie sind jedoch in Kontakt mit am Coronavirus infizierten Personen gekommen. Es ist <b>daher möglich</b> , dass auch Sie sich angesteckt haben, auf Grund der zweiwöchigen Ausbruchszeit jedoch noch keine Symptome zeigen.                                                                                                                                           | Medium |
|             | Ihre Symptome deuten auf eine schwere Grippe bzw. Lungenentzündung hin. Außerdem waren Sie potentiell in Kontakt mit am Coronavirus infizierten Personen. Es ist <b>möglich</b> , dass auch Sie sich angesteckt haben.                                                                                                                                                                                               | Medium |
|             | "Sie zeigen deutliche grippeähnliche Symptome sowie erste Anzeichen einer Lungenentzündung. Außerdem waren Sie potentiell in Kontakt mit am Coronavirus infizierten Personen. Es ist <b>daher möglich</b> , dass auch Sie sich angesteckt haben.                                                                                                                                                                     | Medium |
| Providence  | You do not report exposure to coronavirus (COVID-19) and do not have symptoms. You don't report any symptoms of coronavirus infection, so your risk is <b>low</b> . You can use this tool again or call your provider if anything changes, but in the meantime:                                                                                                                                                      | Low    |
|             | You <b>might be</b> infected with coronavirus (COVID-19). Please do one of the following: Call 911 for a life-threatening emergency. Schedule an evaluation with your primary care physician. Speak with a provider at Express Care Virtual.                                                                                                                                                                         | Medium |
|             | Please do one of the following: Call 911 for a life-threatening emergency. Schedule an evaluation with your primary care physician. Speak with a provider at Express Care Virtual.                                                                                                                                                                                                                                   | High   |
| Symptoma    | <b>High risk</b> for COVID-19                                                                                                                                                                                                                                                                                                                                                                                        | High   |
|             | <b>Medium risk</b> for COVID-19                                                                                                                                                                                                                                                                                                                                                                                      | Medium |
|             | <b>Low risk</b> for COVID-19                                                                                                                                                                                                                                                                                                                                                                                         | Low    |
| Infermedica | Your symptoms <b>do not suggest</b> that you have COVID-19. Continue following the common measures and government directives to avoid contracting COVID-19. Remember that your symptoms may also result from other diseases and may require medical consultation - this interview targets the COVID-19 infection. If your symptoms seem severe and you are worried, contact your doctor or local health authorities. | Low    |
|             | Your symptoms are worrisome and <b>may be related</b> to COVID-19. Call your local COVID-19-related healthcare number. Depending on the country, this may be a telephone line issued by the Ministry of Health or Health Department.                                                                                                                                                                                 | Medium |
| Your.MD     | <b>There's nothing at present to suggest</b> that you have coronavirus (COVID-19). Please practice physical/social distancing.                                                                                                                                                                                                                                                                                       | Low    |
|             | You <b>may</b> have coronavirus (COVID-19).                                                                                                                                                                                                                                                                                                                                                                          | Medium |
|             | You <b>may</b> still be at risk of coronavirus (COVID-19).                                                                                                                                                                                                                                                                                                                                                           | Medium |
|             | You're <b>highly likely</b> to have coronavirus (COVID-19).                                                                                                                                                                                                                                                                                                                                                          | High   |
|             | Call an ambulance immediately. Please tell them you have symptoms that may be caused by coronavirus (COVID-19).                                                                                                                                                                                                                                                                                                      | High   |
