# Supplementary material for: Diagnostic Accuracy of Web-Based COVID-19 Symptom Checkers: Comparison Study
Source: PubMed Central journal article supplement (PMC7541039; doi:10.2196/21299), 2020-10-06
Supplement: jmir_v22i10e21299_app7.pdf [file jmir_v22i10e21299_app7.pdf]

Multimedia Appendix 7. Full table of sensitivity, specificity, accuracy, F1 score and MCC for all symptom checkers (COVID-19 positive defined by “medium risk or “high risk” for non binary symptom checkers)

| Symptom checker         | sensitivity | specificity | accuracy | F1 score | MCC  |
|-------------------------|-------------|-------------|----------|----------|------|
| Ada                     | 0.36        | 0.67        | 0.51     | 0.42     | 0.03 |
| Apple                   | 0.98        | 0.17        | 0.57     | 0.70     | 0.25 |
| Babylon                 | 0.90        | 0.33        | 0.62     | 0.70     | 0.29 |
| CDC                     | 0.94        | 0.29        | 0.61     | 0.71     | 0.30 |
| Cleveland Clinic        | 0.98        | 0.41        | 0.69     | 0.76     | 0.47 |
| Docyet                  | 0.16        | 1.00        | 0.58     | 0.27     | 0.29 |
| Infermedica             | 0.78        | 0.83        | 0.80     | 0.80     | 0.61 |
| Providence              | 0.98        | 0.38        | 0.68     | 0.75     | 0.45 |
| SF-COS                  | 0.90        | 0.66        | 0.78     | 0.80     | 0.58 |
| SF-DIST                 | 0.52        | 0.70        | 0.61     | 0.57     | 0.22 |
| Symptoma                | 0.94        | 0.88        | 0.91     | 0.91     | 0.83 |
| <a href="#">Your.MD</a> | 0.94        | 0.32        | 0.63     | 0.72     | 0.33 |
