# Supplementary material for: Diagnostic Accuracy of Web-Based COVID-19 Symptom Checkers: Comparison Study
Source: PubMed Central journal article supplement (PMC7541039; doi:10.2196/21299), 2020-10-06
Supplement: jmir_v22i10e21299_app9.pdf [file jmir_v22i10e21299_app9.pdf]

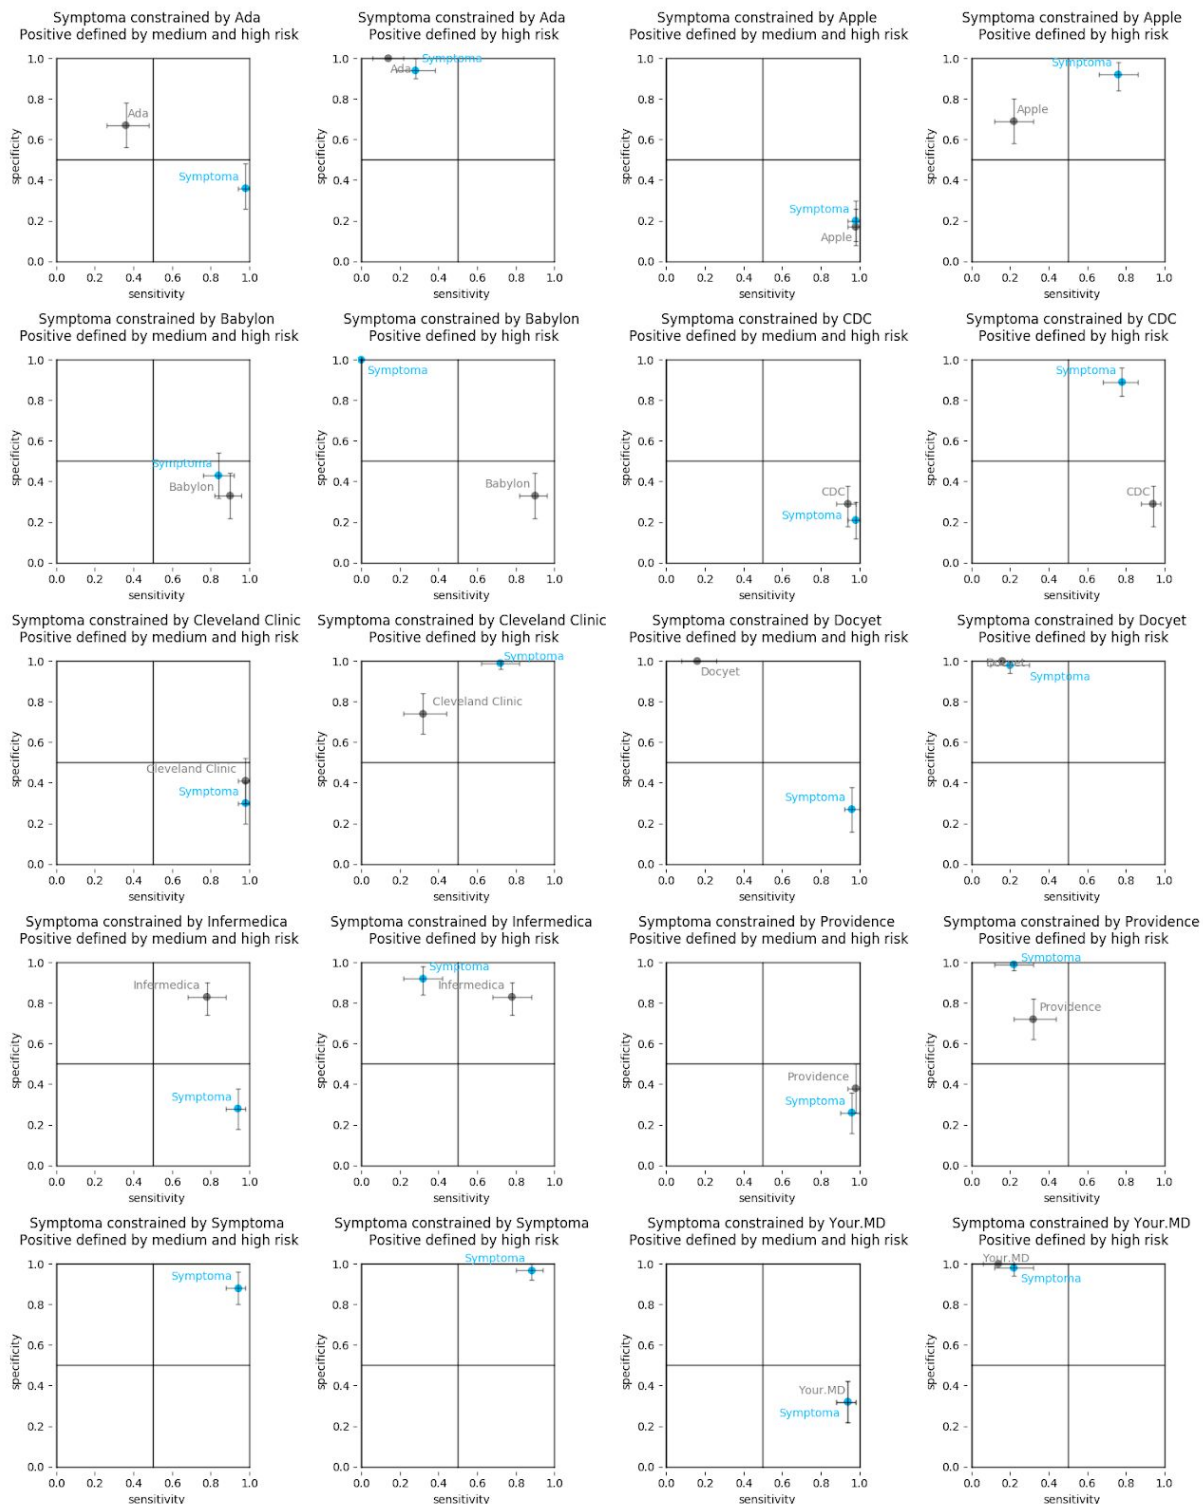

Multimedia Appendix 9. Sensitivity vs specificity for all symptom checkers and Symptoma input constraint respectively by each symptom checker
