# Supplementary material for: Diagnostic Accuracy of Web-Based COVID-19 Symptom Checkers: Comparison Study
Source: PubMed Central journal article supplement (PMC7541039; doi:10.2196/21299), 2020-10-06
Supplement: jmir_v22i10e21299_app10.pdf [file jmir_v22i10e21299_app10.pdf]

Multimedia Appendix 10. Full table of sensitivity, specificity, accuracy, F1 score and MCC for Symptoma constrained by each symptom checker (COVID-19 positive defined by “high risk” for non binary symptom checkers)

| <b>Symptoma constrained by</b> | <b>sensitivity</b> | <b>specificity</b> | <b>accuracy</b> | <b>F1 score</b> | <b>MCC</b> |
|--------------------------------|--------------------|--------------------|-----------------|-----------------|------------|
| Ada                            | 0.28               | 0.94               | 0.61            | 0.42            | 0.30       |
| Apple                          | 0.76               | 0.92               | 0.84            | 0.82            | 0.69       |
| Babylon                        | 0.00               | 1.00               | 0.50            | 0.00            | n/a        |
| CDC                            | 0.78               | 0.89               | 0.83            | 0.82            | 0.68       |
| Cleveland Clinic               | 0.72               | 0.99               | 0.85            | 0.83            | 0.73       |
| Docyet                         | 0.20               | 0.98               | 0.59            | 0.33            | 0.29       |
| Infermedica                    | 0.32               | 0.92               | 0.62            | 0.45            | 0.30       |
| Providence                     | 0.22               | 0.99               | 0.60            | 0.35            | 0.32       |
| Your.MD                        | 0.22               | 0.98               | 0.60            | 0.35            | 0.31       |
