# Supplementary material for: Diagnostic Accuracy of Web-Based COVID-19 Symptom Checkers: Comparison Study
Source: PubMed Central journal article supplement (PMC7541039; doi:10.2196/21299), 2020-10-06
Supplement: jmir_v22i10e21299_app11.pdf [file jmir_v22i10e21299_app11.pdf]

Multimedia Appendix 11. Full table of sensitivity, specificity, accuracy, F1 score and MCC for Symptoma constrained by each symptom checker (COVID-19 positive defined by “medium risk” or “high risk” for non binary symptom checkers)

| <b>Symptoma constrained by</b> | <b>sensitivity</b> | <b>specificity</b> | <b>accuracy</b> | <b>F1 score</b> | <b>MCC</b> |
|--------------------------------|--------------------|--------------------|-----------------|-----------------|------------|
| Ada                            | 0.98               | 0.36               | 0.67            | 0.75            | 0.44       |
| Apple                          | 0.98               | 0.20               | 0.59            | 0.70            | 0.28       |
| Babylon                        | 0.84               | 0.43               | 0.63            | 0.70            | 0.30       |
| CDC                            | 0.98               | 0.21               | 0.59            | 0.71            | 0.29       |
| Cleveland Clinic               | 0.98               | 0.30               | 0.64            | 0.73            | 0.38       |
| Docyet                         | 0.96               | 0.27               | 0.62            | 0.71            | 0.32       |
| Infermedica                    | 0.94               | 0.28               | 0.61            | 0.71            | 0.29       |
| Providence                     | 0.96               | 0.26               | 0.61            | 0.71            | 0.31       |
| Your.MD                        | 0.94               | 0.32               | 0.63            | 0.72            | 0.33       |
