# Supplementary material for: Diagnostic Accuracy of Web-Based COVID-19 Symptom Checkers: Comparison Study
Source: PubMed Central journal article supplement (PMC7541039; doi:10.2196/21299), 2020-10-06
Supplement: jmir_v22i10e21299_app12.pdf [file jmir_v22i10e21299_app12.pdf]

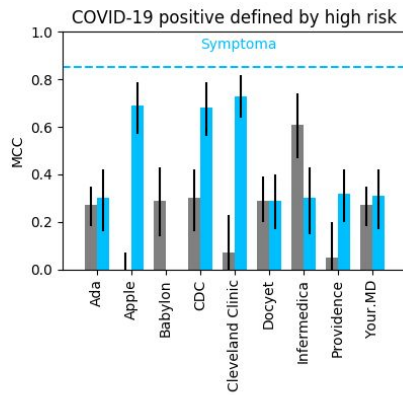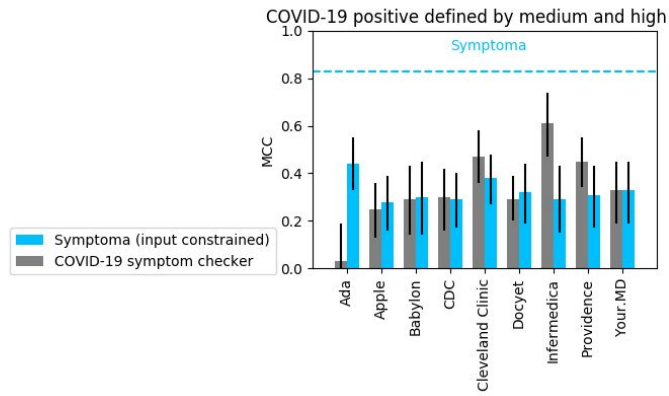

Multimedia Appendix 12. Pairwise comparison between all symptom checkers and Symptoma based on the MCC if only the subset of symptoms used by one checker is also used for Symptoma.
